# Supplementary material for: Assessment of Bioavailability Parameters of Mono- and Bistriazole Derivatives of Propynoylbetulin
Source: MDPI journal article supplement (doi:10.3390/app14051695), 2024-02-20
Supplement: s1 [file s1]

## Supplementary materials

# Assessment of Bioavailability Parameters of Mono- and Bistriazole Derivatives of Propynoylbetulin

Monika Kadela-Tomanek, Arkadiusz Sokal, Klaudia Stocierz, Ewa Bębenek, Elwira Chrobak, and Paweł Olczyk

Table S1: The theoretical value of lipophilicity of compounds **3-18**.

| Compound  | ALOGPs | AClogP | miLogP | XLOGP2 | XLOGP3 | logP <sub>calc</sub> |
|-----------|--------|--------|--------|--------|--------|----------------------|
| <b>3</b>  | 7.32   | 7.05   | 7.41   | 7.12   | 7.08   | 7.20                 |
| <b>4</b>  | 7.32   | 7.07   | 7.46   | 7.35   | 7.14   | 7.49                 |
| <b>5</b>  | 7.14   | 6.96   | 7.31   | 6.97   | 6.92   | 6.66                 |
| <b>6</b>  | 7.39   | 8.01   | 7.56   | 7.34   | 7.45   | 6.70                 |
| <b>7</b>  | 4.78   | 5.49   | 4.73   | 5.14   | 4.86   | 4.83                 |
| <b>8</b>  | 5.70   | 5.80   | 5.84   | 5.46   | 5.64   | 6.24                 |
| <b>9</b>  | 6.07   | 6.28   | 6.19   | 6.04   | 5.93   | 5.98                 |
| <b>10</b> | 6.47   | 6.29   | 6.63   | 6.29   | 6.38   | 6.15                 |
| <b>11</b> | 8.13   | 7.55   | 7.89   | 8.20   | 8.20   | 8.44                 |
| <b>12</b> | 8.19   | 7.60   | 7.95   | 8.37   | 8.32   | 8.95                 |
| <b>13</b> | 8.14   | 7.38   | 7.79   | 7.91   | 7.88   | 7.36                 |
| <b>14</b> | 8.30   | 9.48   | 8.05   | 8.64   | 8.94   | 7.45                 |
| <b>15</b> | 3.51   | 4.43   | 3.20   | 4.24   | 3.76   | 3.70                 |
| <b>16</b> | 5.37   | 5.07   | 5.41   | 4.88   | 5.32   | 7.00                 |
| <b>17</b> | 5.88   | 6.02   | 6.10   | 6.04   | 5.89   | 6.01                 |
| <b>18</b> | 6.81   | 6.04   | 6.98   | 6.54   | 6.80   | 6.35                 |

Table S2: The similarity parameter (ED) for the theoretical and experimental lipophilicity for compounds **3-18**.

| Compound  | ED   | Compound  | ED   |
|-----------|------|-----------|------|
| <b>3</b>  | 0.94 | <b>11</b> | 0.95 |
| <b>4</b>  | 0.94 | <b>12</b> | 0.95 |
| <b>5</b>  | 0.89 | <b>13</b> | 0.83 |
| <b>6</b>  | 0.66 | <b>14</b> | 0.66 |
| <b>7</b>  | 0.66 | <b>15</b> | 0.00 |
| <b>8</b>  | 0.79 | <b>16</b> | 0.66 |
| <b>9</b>  | 0.92 | <b>17</b> | 0.93 |
| <b>10</b> | 0.79 | <b>18</b> | 0.79 |
